# Supplementary material
Source: PubMed Central journal article supplement (PMC3589710)
Supplement: NIHMS413175-supplement-02.pdf [file NIHMS413175-supplement-02.pdf]

Figure S2

```

1      10      20      30      40      50      60      70
AtPreP1 MLRTVSVCLASRSSSSLLFRFRQFPPRSYMSLTSSTAALRVPSRNLRRISPPSVAGRLLLRRLGRIPSA
AtPreP2 MLRSLTCSSTITSTSLFFRSFRQLPRSYLSPSSSTTVVGASGRNIRRLSTLEAAGRLLFLRRGLKLLSAA
PreP_Sp .....
Mop112_Sc .....
PreP_Mm .....MWRFSGRRGLCA
PreP_Rn .....MWRFSGRRGLCA
hPreP .....MWRCGRRGLCV
PreP_Cf .....MWRCGGRAPGF
PreP_Bt .....MWRGGWRARGV
Fln_Pf .....MNLTKLMKVIGYINIIITNCVQSFTNRADKKRYNV

```

```

80      90      100     110     120     130
AtPreP1 VRSVNGQF SRLS VRAVA TQPAPLYPDVGQDEA KLG FEKVSEEF IS ECKSKA I LFKHKK TGC E VMSVSN .
AtPreP2 SRGLNGQF SRLS IRAVA TQSAPSS YPGQDEA KLG FEKVSEEF IS ECKSKA V LFKHKK TGC E VMSVSN .
PreP_Sp .MNYAKLS IAFS KKT IKT HNCRLFRQLWLVGD K VHD FRVVDTK KVP ELQLNY TR LKH EPT NADMIHLDR .
Mop112_Sc .....MLRF QRFAS SYAQAAVARKYPVGG F HG YEVRRIL PVP ELRLTAV D LVHSQ TGA EHLHIDR .
PreP_Mm VQRLSCGR VHRV WREK SDQACERALQYKVG E K I HG FTVNQVT PVP ELFLTAV K LSHDN T GARYLHLAR .
PreP_Rn VQRLSSG VHHV WREK SDQACDRALQYKVG E K I HG FTVNQVT PVP ELFLTAV K LSHDN T GARYLHLAR .
hPreP LRRLSGGH AHHRAWRN SNRACERALQYKLG D K I HG FTVNQVT SVP ELFLTAV K LTHDD T GARYLHLAR .
PreP_Cf LRRSSGG ASPA WRRR GS SACERAQHKVGE Q I HG FTVSQVT A I P ELSLTAV K LSHDR T GARYLHLAR .
PreP_Bt LRRLSGG S AHLGAWR WGS TKACERALQYRIGE R I HG FTVNQVT PVP ELSLTAV K LSHD T GAQY LHLAR .
Fln_Pf FAKSFINT LINTN L Y T F K A V M S K T P E W I H E K S P K H N S Y D I I E K R Y N E E F K M T Y T V Q H K K A K T Q V I S L G T N

```

```

140     150     160     170     180     190     200
AtPreP1 ..ED ENKVF G V V FRT PPKDSTGIPHLEHSVLCGSRKYPVKEPFFVELLKGSLHTFDLNAFTYPTDRTCYPVA
AtPreP2 ..DD ENKVF G I V FRT PPKDSTGIPHLEHSVLCGSRKYPVKEPFFVELLKGSLHTFDLNAFTYPTDRTCYPVA
PreP_Sp ..ED ENSVFSIGFQTPAENDEGIPHLEHTTLCGSKYYPVRDPPFKMLNRSLATFMNAFTASDFTYPPFA
Mop112_Sc ..DD KNNVFSIAFKTNPEDSTGVPHLEHTTLCGSKYYPVRDPPFKMLNRSLATFMNAFTASDFTYPPFA
PreP_Mm ..ED KNNLFSVQFRTTFMDSTGVPHLEHTVLCGSKYYPVRDPPFKMLNRSLATFMNAFTASDFTYPPFA
PreP_Rn ..ED KNNLFSVQFRTTFMDSTGVPHLEHTVLCGSKYYPVRDPPFKMLNRSLATFMNAFTASDFTYPPFA
hPreP ..ED TNNLFSVQFRTTFMDSTGVPHLEHTVLCGSKYYPVRDPPFKMLNRSLATFMNAFTASDFTYPPFA
PreP_Cf ..ED SNNLFSVQFRTTFMDSSGVPHLEHTVLCGSHRYPCRDPPFKMLNRSLATFMNAFTASDFTYPPFA
PreP_Bt ..ED GNNLFSVQFRTTFDSSGAPHLEHTVLCGSRYPVRDPPFKMLNRSLATFMNAFTASDFTYPPFA
Fln_Pf DPLDVEQAFAYVKT LTHSGKGIPHLEHSVLCGSKNNYKNSIGLLEKGT LHTHNAFTYPTDRTVYMA G

```

M97
Zn-Binding site
M126
M135

```

210     220     230     240     250     260
AtPreP1 STNPKDFYNLVDVYLDVAVFPKCVDDAHTFQEGWHYELN...DPSED...ISYKGVVFNEM
AtPreP2 STNPKDFYNLVDVYLDVAVFPKCVDDVHTFQEGWHYELN...DPSED...ISYKGVVFNEM
PreP_Sp TTNPKDFYKDLVDVYLDATLFPKLRK...LDFLQEGWRFHADVNDKKS...IIFNGVVYFNM
Mop112_Sc TTNPKDFANLRGVYLDSTLNP L L K O . . E D F D E G W R L E H K N I T D P E S N . . . . . I V F K G V V F N E M
PreP_Mm TONPKDFQNLISVYLDATFFPCLRE..LDFWQEGWRLHEHNPRDPQTP...LIFKGVVFNEM
PreP_Rn TONPKDFQNLISVYLDATFFPCLRE..LDFWQEGWRLHEHEDPSDPQTP...LIFKGVVFNEM
hPreP TONPKDFQNLISVYLDATFFPCLRE..LDFWQEGWRLHEHNPSDPQTP...LVFKGVVFNEM
PreP_Cf TONPKDFQNLISVYLDVAVFPCLRE..LDFWQEGWRLHEHNPRDPQTP...LIFKGVVFNEM
PreP_Bt TONPKDFQNLISVYLDAAFPCLRE..LDFWQEGWRLHEHEDPNDPQTP...LVFKGVVFNEM
Fln_Pf SMNPKDFNIMGVYMDSVFQPNVLENKYIFEQEGWTEYVLEKLEDEKGAEI PQMKDYK V S F N G I V Y F N E M

```

M206

```

270     280     290     300     310     320     330
AtPreP1 KGVYSQPDNITGRIAQOALS PENTYGVDSGGDKDIPNLTPEEFKFEFRQY YHPSNARIWFGDDDPVHR
AtPreP2 KGVYSQPDNILGRVTQALCPENTYGVDSGGDKDIPKLTPEFKFKEFRQY YHPSNARIWFGDDDPVHR
PreP_Sp KGOVSDSSYIFYMLFQOHLFOGTAYGFNSGGDLAIPDLKYEELVKFRRSHYHPSNAKILSYGSFPLEDN
Mop112_Sc KGOISNANYIFWSKFOOSIY P . . S I N N S G G D P M K I T D L R Y G D L D F H H K N Y H P S N A K T F T Y G N L P L V D T
PreP_Mm KGAFTDNERIFSQHLQNRLLPDHTYSVVSGGDLCEPELTWEQLKOFHATHYHPSNARFFTYGNFPLEGH
PreP_Rn KGAFTDNERIFSQHLQNRLLPDHTYSVVSGGDLCEPELTWEQLKOFHATHYHPSNARFFTYGNFPLEGH
hPreP KGAFTDNERIFSQHLQNRLLPDHTYSVVSGGDLCEPELTWEQLKOFHATHYHPSNARFFTYGNFPLEGH
PreP_Cf KGAFTDNERIFSQHLQNRLLPDHTYSVVSGGDLCEIPDLTWEQLRRFHAMHYHPSNARFFTYGNFPLEQH
PreP_Bt KGAFTDNERIFSQHLQNRLLPDHTYSVVSGGDLCEIPDLTWEQLRRFHAMHYHPSNARFFTYGNFPLEQH
Fln_Pf KGALESPLLEDLYHEEMKYMF P D N V H S N N S G G D P K E I T N L T Y E E F K E F Y K N Y N P K K V K V F F E S K N N P T E L

```

```

340     350     360     370     380     390
AtPreP1 LRVLS EYLDMF EAS P S P N S S K I K F Q K L F S E P V R L V E K Y P A G R D G D L K K H M L C V N W L L S E K P L D L . . . . .
AtPreP2 LRVLS EYLDMF D A S P A R D S S K V E P Q K L F S R P R I V E K Y P A G E D G D L K K H M V C L N W L L S D K P L D L . . . . .
PreP_Sp L S A L S E T F R P F S K R . E L N L P N T F L K E F D Q E K R . . V V E Y G L P D P V M A P G R Q V K T S I S F L A N D T S N . . . . .
Mop112_Sc L K Q I N E Q F S G Y K R . A R K D K L L M P I D L K K D I . . V K L L G Q I D T M L P P E K Q T K A S M T W I C G A P Q D T . . . . .
PreP_Mm L K Q I H E E A L S K F Q R . L E Q S T A V P A O P H W D K P R E F H I T C G P D S L A T E T A K Q T V S V S F L L P D I T D T . . . . .
PreP_Rn L K Q I H E E A L S K F Q K . M E E S T A V P A O K Y W D K P R E F H I T C G P D S L A T A T K Q T V S V S F L L P . . . . .
hPreP L K Q I H E E A L S K F Q K . I E P S T V V P A T P W D K P R E F Q I T C G P D S F A T D P S K Q T T V S V S F L L P D I T D T . . . . .
PreP_Cf L K Q I H K E A L S K F E K . I E T N T A V P A O K P W D K P R E F Q I T C G P D S L A A D S S K Q T T V G V S F L L P D I T D T . . . . .
PreP_Bt L K Q I H E E A L S K F Q R . I E P R T S V P A O K P W D E P R E F Q I T C A P D S L A E G P S G Q T T I S V S F L L P E I T D T . . . . .
Fln_Pf L N F V D Q Y L G Q L D Y S . K Y R D D A V E S V E Y Q T Y K G P F Y I K K Y G D H S E E K E N L V S V A W L L N P K V D K T N N H N N

```

400 410 420 430 440

AtPreP1 .....QTQLALGFLDHLMLGTPASPLRKILLESGLG.EALVSSGLSDE  
 AtPreP2 .....QTQLALGFLDHLMLGTPASPLRKILLESGLG.EALVNSGMEDE  
 PreP\_Sp .....YETFALKVLSKLCFDGFSSPFYKALIESGLGTDFAFNSGYDST  
 Mop112\_Sc .....YDTFLLKVLGNLLMDGHSSVMYQKLIIESGIGLEFVSNSGVPEPT  
 PreP\_Mm .....FEAFTLSLLSSLLIAGPNSPFYKALIESGLGTDFFSDVGYNGY  
 PreP\_Rn .....FEAFTLSLLSSLLTSGPNSPFYKALIESGLGTDFFSDVGYNGY  
 hPreP .....FEAFTLSLLSSLLTSGPNSPFYKALIESGLGTDFFSDVGYNGY  
 PreP\_Cf .....FEAFTLSLLSSLLTSGPNSPFYKALIESGLGTDFFSDVGYNGY  
 PreP\_Bt .....FEAFTLSLLSSLLTSGPNSPFYKALIESGLGTDFFSDVGYNGY  
 Fln\_Pf NHSNNQSSENNGYSNGSHSSDLSLENPTDYFVLLIINNLLIHTPESVLYKALTDCLG.LNNVIDRGLNDS

450 460 470 480 490 500

AtPreP1 LLQPQFGIGLKGVS.....EENVQKVEELIMDTLKKLA.EEGFDNDAVEASMTNTEIEFSLRENNNTGSF  
 AtPreP2 LLQPQFSIGLKGVS.....DDNVQKVEELVMNTRKLA.DEGFDTDAVEASMTNTEIEFSLRENNNTGSS  
 PreP\_Sp TKRGIFSVGLEGAS.....EESLAKIENLVYSIFNDLAL.KGFENEKLEAILHQMEISLKKH...SA  
 Mop112\_Sc TAVNLLTVGIQGV.....DIEIFKDTVNNIFQNLETEHPFDRKRIDAITEOLELSKKDQ...KA  
 PreP\_Mm TREAYFSVGLQGI.....EKDVKTVRELVDRITIEEVI.EKGFEDDRIEALLHKIEIQMKHQ...SA  
 PreP\_Rn TREAYFSVGLQGI.....EKDVKTVRELVDRITIEEVI.EKGFEDDRIEALLHKIEIQMKHQ...SA  
 hPreP TREAYFSVGLQGI.....EKDIETVRSRIDRTIDEVVEKGFEDDRIEALLHKIEIQMKHQ...ST  
 PreP\_Cf TREAYFSVGLQGIS.....EQDTQSVRDIIDRTIEEVI.EKGFEDDRIEALLHKIEIQMKHQ...SV  
 PreP\_Bt TREAYFSVGLQGI.....EKDVQTVRDIIDRTIIDDVIEKGFEDDRIEALLHKIEIQMKHQ...SV  
 Fln\_Pf LVQYIFSIGLKGIKRNNKIKNFDFKVHYEVEDVIMNALKKVV.KEGFNKSAVEASINTEIEFSLRENNNTGSS

510 520 530 540 550 560 570

AtPreP1 PRGLSMLQSIKWIYDMDFEPKLYTEPKLAKTRIAEESGSKAVFSPLEKELTLNNSHRVTIEMQPPDE  
 AtPreP2 PRGLSMLQSIKWIYDMDFEPKLYTEPKLAKTRIAEESGSKAVFSPLEKELTLNNSHRVTIEMQPPDE  
 PreP\_Sp HFGLLAQSLPFWFNAGDPPADWLSFNKQIEWLK...QKNSD.GKLFQKLIKKYILENKSFRVFTMLPSSST  
 Mop112\_Sc DFGLLLYSILPGWTKIDPFESLLEFEDVLRFRGDLTKG.DTLFQDLIRKYIVHHP.CFTFSIQGSEEE  
 PreP\_Mm SFGLTLTSYIASCWNHDGDPVELLQIGSOLTRFRKCKLEN...PKFLOEKVEQYFKNNQHKLTLSMKPDDK  
 PreP\_Rn SFGLTLTSYIASCWNHDGDPVELLQIGSOLTRFRKCKLEN...PKFLOEKVEQYFKNNPHRLTLSMKPDDK  
 hPreP SFGLTLTSYIASCWNHDGDPVELLQIGSOLTRFRKCKLEN...PKFLOEKVEQYFKNNQHKLTLSMKPDDK  
 PreP\_Cf SFGLTLTSYIASCWNHDGDPVELLQIGSOLTRFRKCKLEN...PKFLOEKVEQYFKNNPHKLTLSMKPDDK  
 PreP\_Bt SFGLTLTSYIASCWNHDGDPVELLQIGSOLTRFRKCKLEN...PKFLOEKVEQYFKNNRHKLTLSMKPDDK  
 Fln\_Pf SKSLIDFVFMTSKLNYNRDPVLLIFEFKYLNIVKKNKIKNE...PMYLEKFEVKEHFIINNAHRSVIILLEGDEN

M504

580 590 600 610 620 630 640

AtPreP1 KAQOEVEEKNILEKVKAAAMTEEDLAEIARATBELKLEKQETFPDPEALRCVPSLNLGDIIPKEPTYVPTTEV  
 AtPreP2 KAQOEVEEKNILEKVKAAAMTEEDLAEIARATBELKLEKQETFPDPEALRCVPSLNLGDIIPKEPTYVPTTEV  
 PreP\_Sp FPKRLQEAQAKKLOERTSKLTDEDIAEIKTSVKLLEAQSTPAD...TSCPLTSLVSDIPEPTIDEKTKLKF  
 Mop112\_Sc FSKSLDDEEQTRLREKITALDEODKKNIFKRGILLQEKQNEKED...LSCLPTLQIKDIPRAGDKYSIEQ  
 PreP\_Mm YYEKQTMETEKLQKVNLSLSPADKQIYKGLLELOQOQSKHQD...ASCLPALKVSDIEPSPFFTKLDI  
 PreP\_Rn YYEKQTMETEKLQKVNLSLSPADKQIYKGLLELOQOQSKHQD...ASCLPALKVSDIEPMPFFTKFDI  
 hPreP YHKAQAVAEATKLKQKVEALSQCRRQIYKGLLELRSQOQSKHQD...ASCLPALKVSDIEPTIPVTELDV  
 PreP\_Cf YHKAQAVAEATKLKQKVNLSLSPADKQIYKGLLELOQOQSKHQD...ASCLPALKVSDIEPMSFTLELV  
 PreP\_Bt YHKAQAVAEATKLQKVTSLSPADKQIYKGLLELOQOQSKHQD...ASCLPALKVSDIEPMPVTELV  
 Fln\_Pf YAEQENLEKQELKKRIENFNEOEKEQVINKFELISKYKNAEESPEHLNKFPIIISIDLNKRTLEVPVNV

650

AtPreP1 GDIT.....NGVKVL  
 AtPreP2 GDIT.....NGVKVL  
 PreP\_Sp LDIT.....AGMKAO  
 Mop112\_Sc KNIN.....TMSRIT  
 PreP\_Mm GLA.....AGDIPV  
 PreP\_Rn ALS.....AGDIPV  
 hPreP VLT.....AGDIPV  
 PreP\_Cf ALA.....AGETPV  
 PreP\_Bt VQA.....ARDTPV  
 Fln\_Pf YFTINENNNIMETYNKIKTNEHMLKDNMDVFLKKYVVKNDKHNNTNNNNNNNNMMDYSFTETKYEGNVPI

660 670 680 690 700 710

AtPreP1 RHDLFNTN.DIITYTEVVFDMGSLKHELPLVPLFCQSLLEMGTKD.LTFVQLNQLIQRKTEGGISVYPLTSSV  
 AtPreP2 RNDLFNTN.NIITYTEVVFDMGSKHLLQLIPLFCQSLLEMGTKD.LTFVQLNQLIQRKTEGGISVYPLTSSV  
 PreP\_Sp WYDLAAG..LTYIRLLPLKNFPELIPYLPVYDACLNLGTHSESIGDLHQIRRYTEGGISVYPLTSSV  
 Mop112\_Sc DTNGITY..VRGKRLLN..DIPPELFPYLPFAESLTLNLGTTTEFSFIEDIQIKLHTGGIST.HVEVTS  
 PreP\_Mm QYCPQPTNGMVFYRAFSSLNTLPEELRPYVPLFCQSVLTKLCCGILNRYEQAAQIELKTEGMSVTPHVPD  
 PreP\_Rn QYCPQPTNGMVFYRAFSSLNTLPEELRPYVPLFCQSVLTKLCCGILNRYEQAAQIELKTEGMSVTPHVPD  
 hPreP QYCAQPTNGMVFYRAFSSLNTLPEELRPYVPLFCQSVLTKLCCGILDYREQAQIELKTEGMSASPHVLPD  
 PreP\_Cf QYCAQPTNGMVFYRAFSLHTLPNELRPYVPLFCQSVLTKLCCGILDYREQAQIELKTEGMSVTPHVPD  
 PreP\_Bt QYCAQPTNGMVFYRAFSSLNTLPEELRPYVPLFCQSVLTKLCCGILDYRELAQVLEKTEGMSASPHVLPD  
 Fln\_Pf LVYEMPTTGIVVYQFVFSLDHLTVDELAYLNLFKTLLENKTNKRSSSEDFVILRERKNIGSMSANVALYK

720 730 740 750 760 770 780  
AtPreP1 RG.KDEPCSK... IIVRGKSMAGRAEDLFNLMNCVLLQEVQFT.DQORFKQFVSSQRARMENRLRGS<sup>GH</sup>  
AtPreP2 YG.RDDPCSK... IIVRGKSMVGR AEDLFNLMNCVLLQEVQFT.DQORFKQFVSSQRARMENRLRGS<sup>GH</sup>  
PreP\_Sp NSDVSKEYELG... IAISSGYALDKNVGVKLVLELNKAFWNTNLS.NTDKLAIMLKTSSVSGITDGI<sup>AEGH</sup>  
Mop112\_Sc DPNTTEPRLI... FGFDFGWSLNSKTDHIFEFWSKILL<sup>ETD</sup>FHKNSDKLVKVLIRLLASSNTSSV<sup>ADAGH</sup>  
PreP\_Mm DSQLDTYE... VLFSSSLC LERNLDPMMHLWSEIFN<sup>PCFE</sup>.EEHFKVLV<sup>KMTAQE</sup>LSNGIPD<sup>SGH</sup>  
PreP\_Rn DSQLDTYE... VLFSSSLC LERNLDPMMHLWSEIFN<sup>PCFE</sup>.EEHFKVLV<sup>KMTAQE</sup>LSNGIPD<sup>SGH</sup>  
hPreP DSHMDTYE... VLFSSSLC LERNLDPMMHLWSEIFN<sup>PCFE</sup>.EEHFKVLV<sup>KMTAQE</sup>LSNGIPD<sup>SGH</sup>  
PreP\_Cf DVHLDTYE... VLFSSSFC LDRNLPDMMHLWSEIFN<sup>PCFE</sup>.EEHFKVLV<sup>KMTAQE</sup>LSNGIPD<sup>SGH</sup>  
PreP\_Bt DSHLNTYE... VLFSSSFC LDRNLPDMMHLWSEILN<sup>PCFE</sup>.EEHFKVLV<sup>KMTAQE</sup>LSNGIPD<sup>SGH</sup>  
Fln\_Pf DDHLNVTDKYNAQALFNL<sup>EMHV</sup>L<sup>SHK</sup>CND<sup>ALN</sup>TAL<sup>EA</sup>VK<sup>ESD</sup>F<sup>S</sup>N<sup>KKK</sup>V<sup>IDI</sup>L<sup>L</sup>R<sup>K</sup>I<sup>NG</sup>M<sup>KT</sup>F<sup>SE</sup>K<sup>GV</sup>

790 800 810 820 830 840  
AtPreP1 GI<sup>AA</sup>ARM<sup>D</sup>AM<sup>LN</sup>I<sup>AG</sup>W<sup>MS</sup>E<sup>Q</sup>MG<sup>GL</sup>S<sup>Y</sup>L<sup>EF</sup>L<sup>H</sup>T<sup>LE</sup>E<sup>KK</sup>... V<sup>DE</sup>D<sup>W</sup>E<sup>G</sup>I<sup>SS</sup>S<sup>L</sup>E<sup>E</sup>I<sup>RR</sup>S<sup>LL</sup>AR<sup>NG</sup>C<sup>IV</sup>N<sup>MT</sup>.  
AtPreP2 GI<sup>AA</sup>ARM<sup>D</sup>AM<sup>LN</sup>V<sup>AG</sup>W<sup>MS</sup>E<sup>Q</sup>MG<sup>GL</sup>S<sup>Y</sup>L<sup>EF</sup>L<sup>H</sup>T<sup>LE</sup>E<sup>Q</sup>K... V<sup>DD</sup>Q<sup>W</sup>E<sup>G</sup>I<sup>SS</sup>S<sup>L</sup>E<sup>E</sup>I<sup>RR</sup>S<sup>FL</sup>SR<sup>NG</sup>C<sup>IV</sup>N<sup>MT</sup>.  
PreP\_Sp SF<sup>AK</sup>V<sup>SS</sup>AS<sup>GL</sup>E<sup>KT</sup>S<sup>IT</sup>E<sup>QL</sup>G<sup>L</sup>T<sup>Q</sup>V<sup>KL</sup>S<sup>QL</sup>... R<sup>ES</sup>F<sup>G</sup>.P<sup>L</sup>V<sup>E</sup>K<sup>L</sup>T<sup>A</sup>I<sup>RE</sup>I<sup>L</sup>R<sup>GT</sup>S<sup>GF</sup>K<sup>A</sup>I<sup>N</sup>.  
Mop112\_Sc AF<sup>ARG</sup>Y<sup>SA</sup>AH<sup>Y</sup>R<sup>SS</sup>G<sup>AIN</sup>E<sup>T</sup>LN<sup>G</sup>I<sup>E</sup>Q<sup>L</sup>F<sup>IN</sup>R<sup>L</sup>HS<sup>L</sup>LD<sup>N</sup>E<sup>ET</sup>F<sup>Q</sup>R<sup>E</sup>V<sup>V</sup>D<sup>K</sup>L<sup>E</sup>T<sup>E</sup>L<sup>Q</sup>K<sup>Y</sup>I<sup>V</sup>D<sup>T</sup>N<sup>N</sup>M<sup>N</sup>F<sup>IT</sup>S  
PreP\_Mm LY<sup>AA</sup>L<sup>RA</sup>S<sup>K</sup>T<sup>L</sup>T<sup>P</sup>S<sup>GD</sup>L<sup>Q</sup>E<sup>T</sup>F<sup>S</sup>G<sup>MD</sup>Q<sup>V</sup>K<sup>V</sup>M<sup>K</sup>R<sup>IA</sup>... E<sup>MT</sup>D<sup>I</sup>K<sup>P</sup>I<sup>L</sup>R<sup>K</sup>L<sup>P</sup>R<sup>I</sup>K<sup>Y</sup>L<sup>L</sup>N<sup>C</sup>D<sup>N</sup>M<sup>R</sup>C<sup>SV</sup>N.  
PreP\_Rn LY<sup>AA</sup>L<sup>RA</sup>G<sup>K</sup>T<sup>L</sup>T<sup>P</sup>A<sup>GD</sup>L<sup>Q</sup>E<sup>T</sup>F<sup>S</sup>G<sup>MD</sup>Q<sup>V</sup>K<sup>V</sup>M<sup>K</sup>R<sup>IA</sup>... E<sup>MT</sup>D<sup>I</sup>K<sup>P</sup>I<sup>L</sup>R<sup>K</sup>L<sup>P</sup>R<sup>I</sup>K<sup>Y</sup>L<sup>L</sup>N<sup>C</sup>D<sup>N</sup>M<sup>R</sup>C<sup>SV</sup>N.  
hPreP LY<sup>AS</sup>I<sup>R</sup>A<sup>G</sup>R<sup>T</sup>L<sup>T</sup>P<sup>AG</sup>D<sup>L</sup>Q<sup>E</sup>T<sup>F</sup>S<sup>G</sup>M<sup>D</sup>Q<sup>V</sup>R<sup>L</sup>M<sup>K</sup>R<sup>IA</sup>... E<sup>MT</sup>D<sup>I</sup>K<sup>P</sup>I<sup>L</sup>R<sup>K</sup>L<sup>P</sup>R<sup>I</sup>K<sup>Y</sup>L<sup>L</sup>N<sup>C</sup>D<sup>N</sup>M<sup>R</sup>C<sup>SV</sup>N.  
PreP\_Cf LY<sup>AS</sup>V<sup>RA</sup>S<sup>R</sup>T<sup>L</sup>T<sup>P</sup>T<sup>G</sup>D<sup>L</sup>Q<sup>E</sup>T<sup>F</sup>S<sup>G</sup>M<sup>E</sup>Q<sup>V</sup>K<sup>L</sup>M<sup>K</sup>R<sup>IA</sup>... E<sup>MT</sup>D<sup>L</sup>G<sup>P</sup>V<sup>L</sup>R<sup>K</sup>L<sup>P</sup>H<sup>I</sup>O<sup>K</sup>H<sup>V</sup>L<sup>H</sup>R<sup>D</sup>N<sup>M</sup>R<sup>C</sup>S<sup>M</sup>N.  
PreP\_Bt LY<sup>AS</sup>I<sup>R</sup>A<sup>G</sup>R<sup>T</sup>L<sup>T</sup>P<sup>AG</sup>D<sup>L</sup>Q<sup>E</sup>T<sup>F</sup>S<sup>G</sup>M<sup>D</sup>Q<sup>V</sup>L<sup>L</sup>M<sup>K</sup>R<sup>IA</sup>... E<sup>MT</sup>D<sup>L</sup>Q<sup>P</sup>V<sup>L</sup>G<sup>K</sup>L<sup>L</sup>R<sup>I</sup>W<sup>K</sup>H<sup>L</sup>L<sup>S</sup>C<sup>D</sup>S<sup>L</sup>R<sup>C</sup>S<sup>V</sup>N.  
Fln\_Pf AI<sup>L</sup>M<sup>K</sup>Y<sup>V</sup>K<sup>A</sup>H<sup>L</sup>N<sup>S</sup>K<sup>H</sup>Y<sup>A</sup>H<sup>N</sup>I<sup>I</sup>Y<sup>G</sup>Y<sup>E</sup>N<sup>Y</sup>L<sup>K</sup>L<sup>Q</sup>E<sup>Q</sup>L<sup>E</sup>L... A<sup>EN</sup>D<sup>F</sup>K<sup>T</sup>L<sup>EN</sup>I<sup>L</sup>V<sup>R</sup>I<sup>R</sup>N<sup>K</sup>I<sup>F</sup>N<sup>K</sup>N<sup>L</sup>M<sup>V</sup>S<sup>T</sup>S

850 860 870 880  
AtPreP1 ADG<sup>K</sup>S<sup>L</sup>T<sup>N</sup>V<sup>E</sup>K<sup>S</sup>V<sup>A</sup>K<sup>F</sup>L<sup>L</sup>L<sup>P</sup>ENP... S<sup>G</sup>L<sup>V</sup>T<sup>W</sup>D<sup>G</sup>R<sup>L</sup>P<sup>L</sup>R  
AtPreP2 ADG<sup>K</sup>S<sup>L</sup>T<sup>N</sup>T<sup>E</sup>K<sup>Y</sup>V<sup>G</sup>K<sup>F</sup>L<sup>L</sup>L<sup>P</sup>ENP... S<sup>G</sup>E<sup>L</sup>V<sup>T</sup>W<sup>D</sup>A<sup>R</sup>L<sup>P</sup>L<sup>R</sup>  
PreP\_Sp AS<sup>P</sup>T<sup>Q</sup>H<sup>E</sup>V<sup>V</sup>E<sup>K</sup>A<sup>L</sup>Q<sup>K</sup>F<sup>M</sup>K... S<sup>R</sup>G<sup>V</sup>N<sup>Q</sup>O<sup>T</sup>... Q<sup>T</sup>K<sup>S</sup>T<sup>S</sup>K<sup>E</sup>R<sup>N</sup>G<sup>I</sup>N<sup>S</sup>I  
Mop112\_Sc DSD<sup>V</sup>Q<sup>A</sup>K<sup>T</sup>V<sup>E</sup>S<sup>O</sup>I<sup>S</sup>K<sup>F</sup>M<sup>E</sup>R<sup>L</sup>P<sup>H</sup>G<sup>S</sup>C<sup>L</sup>P<sup>N</sup>... G<sup>P</sup>K<sup>T</sup>S<sup>D</sup>Y<sup>P</sup>L<sup>I</sup>G<sup>S</sup>K<sup>C</sup>K  
PreP\_Mm ATP<sup>Q</sup>M<sup>P</sup>Q<sup>A</sup>E<sup>K</sup>E<sup>V</sup>E<sup>N</sup>F<sup>L</sup>R<sup>N</sup>V<sup>G</sup>R<sup>S</sup>K<sup>K</sup>E<sup>R</sup>K<sup>P</sup>V<sup>R</sup>P<sup>H</sup>I<sup>V</sup>E<sup>K</sup>P<sup>T</sup>P<sup>S</sup>G<sup>P</sup>S<sup>G</sup>A<sup>A</sup>H<sup>V</sup>S<sup>G</sup>.S<sup>Q</sup>I<sup>V</sup>R<sup>K</sup>L<sup>V</sup>T<sup>D</sup>P<sup>T</sup>F<sup>K</sup>P<sup>C</sup>Q<sup>M</sup>  
PreP\_Rn ATP<sup>Q</sup>M<sup>P</sup>Q<sup>A</sup>E<sup>K</sup>E<sup>V</sup>E<sup>N</sup>F<sup>L</sup>R<sup>N</sup>V<sup>G</sup>R<sup>S</sup>K<sup>K</sup>E<sup>R</sup>K<sup>P</sup>V<sup>R</sup>P<sup>H</sup>I<sup>V</sup>E<sup>K</sup>P<sup>T</sup>P<sup>S</sup>G<sup>P</sup>S<sup>G</sup>A<sup>A</sup>H<sup>A</sup>D<sup>G</sup>.S<sup>Q</sup>I<sup>I</sup>R<sup>K</sup>L<sup>I</sup>T<sup>D</sup>P<sup>T</sup>F<sup>K</sup>P<sup>C</sup>Q<sup>M</sup>  
hPreP ATP<sup>Q</sup>M<sup>P</sup>Q<sup>T</sup>E<sup>R</sup>A<sup>V</sup>E<sup>D</sup>F<sup>L</sup>R<sup>S</sup>I<sup>G</sup>R<sup>S</sup>K<sup>K</sup>E<sup>R</sup>R<sup>P</sup>V<sup>R</sup>P<sup>H</sup>T<sup>V</sup>E<sup>K</sup>P<sup>V</sup>P<sup>S</sup>S<sup>G</sup>D<sup>A</sup>H<sup>V</sup>P<sup>H</sup>G<sup>S</sup>Q<sup>V</sup>I<sup>R</sup>K<sup>L</sup>M<sup>E</sup>P<sup>T</sup>F<sup>K</sup>P<sup>W</sup>Q<sup>M</sup>  
PreP\_Cf ATP<sup>Q</sup>M<sup>S</sup>L<sup>A</sup>A<sup>K</sup>A<sup>V</sup>E<sup>K</sup>F<sup>I</sup>R<sup>S</sup>L<sup>S</sup>W<sup>S</sup>K<sup>K</sup>E<sup>Q</sup>E<sup>P</sup>V<sup>C</sup>P<sup>V</sup>V<sup>E</sup>K<sup>P</sup>A<sup>P</sup>G<sup>G</sup>S<sup>S</sup>V<sup>S</sup>H<sup>V</sup>S<sup>G</sup>.P<sup>R</sup>V<sup>L</sup>R<sup>K</sup>L<sup>I</sup>T<sup>D</sup>P<sup>T</sup>F<sup>K</sup>P<sup>C</sup>Q<sup>M</sup>  
PreP\_Bt ATA<sup>Q</sup>M<sup>L</sup>Q<sup>V</sup>E<sup>G</sup>A<sup>V</sup>E<sup>A</sup>F<sup>L</sup>R<sup>S</sup>L<sup>S</sup>R<sup>T</sup>E<sup>K</sup>E<sup>Q</sup>R<sup>S</sup>M<sup>C</sup>P<sup>H</sup>V<sup>V</sup>E<sup>K</sup>P<sup>A</sup>P<sup>K</sup>A<sup>S</sup>S<sup>G</sup>S... C<sup>L</sup>V<sup>I</sup>R<sup>R</sup>L<sup>V</sup>T<sup>D</sup>P<sup>T</sup>F<sup>E</sup>P<sup>C</sup>Q<sup>M</sup>  
Fln\_Pf DY<sup>G</sup>A<sup>L</sup>K<sup>H</sup>L<sup>F</sup>V<sup>N</sup>S<sup>N</sup>E<sup>S</sup>L<sup>K</sup>N<sup>L</sup>V<sup>S</sup>Y<sup>F</sup>E<sup>E</sup>N<sup>D</sup>K<sup>Y</sup>I<sup>N</sup>D<sup>M</sup>Q<sup>N</sup>K<sup>V</sup>N<sup>D</sup>P<sup>T</sup>V<sup>M</sup>G<sup>W</sup>N... E<sup>I</sup>K<sup>S</sup>K<sup>L</sup>F<sup>D</sup>E<sup>E</sup>K<sup>V</sup>

890 900 910 920 930 940 950  
AtPreP1 N<sup>E</sup>A<sup>I</sup>V<sup>I</sup>P<sup>T</sup>Q<sup>V</sup>N<sup>Y</sup>V<sup>G</sup>K<sup>A</sup>G<sup>N</sup>I<sup>Y</sup>S<sup>T</sup>G<sup>Y</sup>E<sup>L</sup>D<sup>G</sup>S<sup>A</sup>Y<sup>V</sup>I<sup>S</sup>K<sup>H</sup>I<sup>S</sup>N<sup>T</sup>W<sup>L</sup>D<sup>R</sup>V<sup>R</sup>V<sup>S</sup>G<sup>G</sup>A<sup>Y</sup>G<sup>F</sup>C<sup>D</sup>F<sup>D</sup>S<sup>H</sup>S<sup>V</sup>F<sup>S</sup>Y<sup>L</sup>S  
AtPreP2 N<sup>E</sup>A<sup>I</sup>V<sup>I</sup>P<sup>T</sup>Q<sup>V</sup>N<sup>Y</sup>V<sup>G</sup>K<sup>A</sup>G<sup>N</sup>I<sup>Y</sup>S<sup>S</sup>G<sup>Y</sup>K<sup>L</sup>D<sup>G</sup>S<sup>S</sup>Y<sup>V</sup>I<sup>S</sup>K<sup>H</sup>I<sup>S</sup>N<sup>T</sup>W<sup>L</sup>D<sup>R</sup>V<sup>R</sup>V<sup>S</sup>G<sup>G</sup>A<sup>Y</sup>G<sup>S</sup>C<sup>D</sup>F<sup>D</sup>S<sup>H</sup>S<sup>V</sup>F<sup>S</sup>L<sup>S</sup>  
PreP\_Sp K<sup>T</sup>Y<sup>H</sup>E<sup>L</sup>P<sup>F</sup>Q<sup>T</sup>Y<sup>F</sup>A<sup>K</sup>S<sup>C</sup>L<sup>G</sup>V<sup>P</sup>Y<sup>T</sup>H<sup>P</sup>D<sup>G</sup>A<sup>P</sup>L<sup>O</sup>I<sup>L</sup>S<sup>S</sup>L<sup>T</sup>H<sup>K</sup>Y<sup>L</sup>H<sup>G</sup>E<sup>I</sup>R<sup>E</sup>K<sup>G</sup>A<sup>G</sup>L<sup>S</sup>Y<sup>S</sup>G<sup>I</sup>D<sup>C</sup>V<sup>L</sup>S<sup>F</sup>F<sup>T</sup>  
Mop112\_Sc H<sup>T</sup>L<sup>L</sup>K<sup>F</sup>P<sup>F</sup>Q<sup>V</sup>Y<sup>H</sup>T<sup>S</sup>Q<sup>A</sup>L<sup>L</sup>G<sup>V</sup>P<sup>Y</sup>T<sup>H</sup>K<sup>D</sup>G<sup>S</sup>A<sup>L</sup>O<sup>V</sup>M<sup>S</sup>N<sup>M</sup>L<sup>T</sup>F<sup>K</sup>H<sup>L</sup>H<sup>R</sup>E<sup>V</sup>R<sup>E</sup>K<sup>G</sup>A<sup>G</sup>Y<sup>G</sup>A<sup>G</sup>L<sup>S</sup>Y<sup>S</sup>A<sup>L</sup>A<sup>G</sup>I<sup>F</sup>S<sup>F</sup>Y<sup>S</sup>  
PreP\_Mm K<sup>T</sup>H<sup>F</sup>V<sup>L</sup>P<sup>F</sup>P<sup>V</sup>N<sup>Y</sup>V<sup>G</sup>E<sup>C</sup>V<sup>R</sup>T<sup>V</sup>P<sup>Y</sup>A<sup>D</sup>P<sup>D</sup>H<sup>A</sup>S<sup>L</sup>K<sup>I</sup>L<sup>A</sup>R<sup>L</sup>M<sup>T</sup>A<sup>K</sup>F<sup>L</sup>H<sup>T</sup>E<sup>I</sup>R<sup>E</sup>K<sup>G</sup>A<sup>G</sup>Y<sup>G</sup>A<sup>K</sup>L<sup>T</sup>.H<sup>S</sup>G<sup>I</sup>F<sup>T</sup>L<sup>Y</sup>S  
PreP\_Rn K<sup>T</sup>H<sup>F</sup>V<sup>L</sup>P<sup>F</sup>P<sup>V</sup>N<sup>Y</sup>V<sup>G</sup>E<sup>C</sup>V<sup>R</sup>T<sup>V</sup>P<sup>Y</sup>A<sup>D</sup>P<sup>D</sup>H<sup>A</sup>S<sup>L</sup>K<sup>I</sup>L<sup>A</sup>R<sup>L</sup>M<sup>T</sup>A<sup>K</sup>F<sup>L</sup>H<sup>T</sup>E<sup>I</sup>R<sup>E</sup>K<sup>G</sup>A<sup>G</sup>Y<sup>G</sup>A<sup>K</sup>V<sup>T</sup>.H<sup>T</sup>G<sup>I</sup>F<sup>T</sup>L<sup>Y</sup>S  
hPreP K<sup>T</sup>H<sup>F</sup>L<sup>M</sup>P<sup>F</sup>P<sup>V</sup>N<sup>Y</sup>V<sup>G</sup>E<sup>C</sup>I<sup>R</sup>T<sup>A</sup>P<sup>T</sup>D<sup>P</sup>D<sup>H</sup>A<sup>S</sup>L<sup>K</sup>I<sup>L</sup>A<sup>R</sup>L<sup>M</sup>T<sup>A</sup>K<sup>F</sup>L<sup>H</sup>T<sup>E</sup>I<sup>R</sup>E<sup>K</sup>G<sup>A</sup>G<sup>Y</sup>G<sup>A</sup>K<sup>L</sup>S.H<sup>N</sup>G<sup>I</sup>F<sup>T</sup>L<sup>Y</sup>S  
PreP\_Cf K<sup>T</sup>H<sup>F</sup>L<sup>M</sup>P<sup>F</sup>P<sup>V</sup>N<sup>Y</sup>V<sup>G</sup>E<sup>C</sup>I<sup>R</sup>T<sup>A</sup>P<sup>T</sup>D<sup>P</sup>D<sup>H</sup>A<sup>S</sup>L<sup>K</sup>I<sup>L</sup>A<sup>R</sup>L<sup>M</sup>T<sup>A</sup>K<sup>F</sup>L<sup>H</sup>T<sup>E</sup>I<sup>R</sup>E<sup>K</sup>G<sup>A</sup>G<sup>Y</sup>G<sup>A</sup>K<sup>L</sup>S.H<sup>N</sup>G<sup>I</sup>F<sup>T</sup>L<sup>Y</sup>S  
PreP\_Bt K<sup>T</sup>H<sup>F</sup>L<sup>L</sup>P<sup>F</sup>P<sup>V</sup>N<sup>Y</sup>V<sup>A</sup>E<sup>C</sup>I<sup>R</sup>T<sup>A</sup>P<sup>T</sup>A<sup>D</sup>P<sup>D</sup>H<sup>A</sup>S<sup>L</sup>K<sup>I</sup>L<sup>A</sup>R<sup>L</sup>M<sup>T</sup>A<sup>K</sup>F<sup>L</sup>H<sup>T</sup>E<sup>I</sup>R<sup>E</sup>K<sup>G</sup>A<sup>G</sup>Y<sup>G</sup>A<sup>K</sup>L<sup>S</sup>.Y<sup>G</sup>M<sup>F</sup>T<sup>L</sup>Y<sup>S</sup>  
Fln\_Pf K<sup>E</sup>F<sup>F</sup>V<sup>L</sup>P<sup>T</sup>F<sup>N</sup>S<sup>V</sup>S<sup>M</sup>S<sup>G</sup>L<sup>F</sup>K<sup>P</sup>G<sup>E</sup>Y<sup>L</sup>D<sup>P</sup>S<sup>F</sup>T<sup>V</sup>I<sup>V</sup>A<sup>L</sup>K<sup>N</sup>S<sup>Y</sup>L<sup>W</sup>D<sup>T</sup>V<sup>R</sup>E<sup>L</sup>N<sup>G</sup>A<sup>Y</sup>G<sup>V</sup>F<sup>A</sup>D<sup>I</sup>E<sup>Y</sup>D<sup>C</sup>S<sup>V</sup>F<sup>L</sup>S

960 970 980 990 1000 1010 1020  
AtPreP1 Y<sup>R</sup>D<sup>P</sup>N<sup>L</sup>L<sup>K</sup>T<sup>L</sup>D<sup>I</sup>Y<sup>D</sup>G<sup>T</sup>G<sup>D</sup>F<sup>L</sup>R<sup>.GLD</sup>V<sup>D</sup>O<sup>E</sup>.T<sup>L</sup>T<sup>K</sup>A<sup>I</sup>I<sup>G</sup>T<sup>I</sup>G<sup>D</sup>V<sup>D</sup>S<sup>Y</sup>Q<sup>L</sup>P<sup>D</sup>A<sup>K</sup>G<sup>Y</sup>S<sup>S</sup>L<sup>L</sup>R<sup>H</sup>L<sup>L</sup>G<sup>V</sup>T<sup>D</sup>E<sup>R</sup>O  
AtPreP2 Y<sup>R</sup>D<sup>P</sup>N<sup>L</sup>L<sup>K</sup>T<sup>L</sup>D<sup>I</sup>Y<sup>D</sup>G<sup>T</sup>G<sup>D</sup>F<sup>L</sup>R<sup>.GLD</sup>V<sup>D</sup>E<sup>D</sup>.T<sup>L</sup>T<sup>K</sup>A<sup>I</sup>I<sup>G</sup>T<sup>I</sup>G<sup>D</sup>V<sup>D</sup>S<sup>Y</sup>Q<sup>L</sup>P<sup>D</sup>A<sup>K</sup>G<sup>Y</sup>T<sup>S</sup>L<sup>L</sup>R<sup>H</sup>L<sup>L</sup>N<sup>V</sup>T<sup>D</sup>E<sup>R</sup>O  
PreP\_Sp Y<sup>R</sup>D<sup>S</sup>Q<sup>L</sup>L<sup>N</sup>V<sup>S</sup>F<sup>D</sup>E<sup>A</sup>S<sup>E</sup>W<sup>A</sup>T<sup>.THE</sup>F<sup>S</sup>Q<sup>R</sup>.D<sup>I</sup>D<sup>E</sup>A<sup>K</sup>L<sup>I</sup>V<sup>F</sup>Q<sup>I</sup>D<sup>S</sup>P<sup>V</sup>S<sup>E</sup>S<sup>Q</sup>K...G<sup>M</sup>L<sup>F</sup>H<sup>V</sup>D<sup>S</sup>G<sup>V</sup>T<sup>D</sup>E<sup>M</sup>L<sup>O</sup>  
Mop112\_Sc Y<sup>R</sup>D<sup>P</sup>Q<sup>P</sup>L<sup>K</sup>S<sup>L</sup>E<sup>T</sup>F<sup>K</sup>N<sup>S</sup>G<sup>R</sup>Y<sup>I</sup>L<sup>N</sup>D<sup>A</sup>K<sup>W</sup>G<sup>V</sup>R<sup>.D</sup>L<sup>D</sup>E<sup>A</sup>K<sup>L</sup>T<sup>I</sup>F<sup>Q</sup>Q<sup>V</sup>D<sup>A</sup>P<sup>K</sup>S<sup>P</sup>K<sup>E</sup>...G<sup>V</sup>T<sup>Y</sup>F<sup>M</sup>S<sup>G</sup>V<sup>T</sup>D<sup>D</sup>M<sup>K</sup>Q  
PreP\_Mm Y<sup>R</sup>D<sup>P</sup>N<sup>S</sup>I<sup>E</sup>T<sup>L</sup>Q<sup>S</sup>F<sup>G</sup>K<sup>A</sup>I<sup>D</sup>W<sup>A</sup>K<sup>.SG</sup>K<sup>F</sup>T<sup>Q</sup>.D<sup>I</sup>D<sup>E</sup>A<sup>K</sup>L<sup>S</sup>V<sup>F</sup>S<sup>T</sup>V<sup>D</sup>S<sup>P</sup>V<sup>A</sup>P<sup>S</sup>D<sup>K</sup>...G<sup>M</sup>D<sup>H</sup>F<sup>L</sup>Y<sup>G</sup>L<sup>S</sup>D<sup>E</sup>M<sup>K</sup>Q  
PreP\_Rn Y<sup>R</sup>D<sup>P</sup>N<sup>S</sup>I<sup>E</sup>T<sup>L</sup>Q<sup>S</sup>F<sup>G</sup>K<sup>A</sup>I<sup>D</sup>W<sup>A</sup>K<sup>.SG</sup>K<sup>F</sup>T<sup>Q</sup>.D<sup>I</sup>D<sup>E</sup>A<sup>K</sup>L<sup>S</sup>V<sup>F</sup>S<sup>T</sup>V<sup>D</sup>S<sup>P</sup>V<sup>A</sup>P<sup>S</sup>D<sup>K</sup>...G<sup>M</sup>D<sup>H</sup>F<sup>L</sup>Y<sup>G</sup>L<sup>S</sup>D<sup>E</sup>M<sup>K</sup>Q  
hPreP Y<sup>R</sup>D<sup>P</sup>N<sup>S</sup>I<sup>E</sup>T<sup>L</sup>Q<sup>S</sup>F<sup>G</sup>K<sup>A</sup>I<sup>D</sup>W<sup>A</sup>K<sup>.SG</sup>K<sup>F</sup>T<sup>Q</sup>.D<sup>I</sup>D<sup>E</sup>A<sup>K</sup>L<sup>S</sup>V<sup>F</sup>S<sup>T</sup>I<sup>D</sup>A<sup>P</sup>V<sup>A</sup>P<sup>S</sup>D<sup>K</sup>...G<sup>M</sup>D<sup>H</sup>F<sup>L</sup>Y<sup>G</sup>L<sup>S</sup>D<sup>E</sup>M<sup>K</sup>Q  
PreP\_Cf Y<sup>R</sup>D<sup>P</sup>R<sup>S</sup>T<sup>E</sup>T<sup>L</sup>Q<sup>S</sup>F<sup>M</sup>K<sup>A</sup>I<sup>D</sup>W<sup>A</sup>K<sup>.A</sup>G<sup>R</sup>F<sup>T</sup>Q<sup>Q</sup>.D<sup>I</sup>D<sup>E</sup>A<sup>K</sup>L<sup>S</sup>V<sup>F</sup>S<sup>V</sup>V<sup>D</sup>A<sup>P</sup>V<sup>A</sup>P<sup>S</sup>D<sup>R</sup>...G<sup>L</sup>D<sup>H</sup>F<sup>L</sup>C<sup>G</sup>L<sup>S</sup>D<sup>E</sup>M<sup>K</sup>Q  
PreP\_Bt Y<sup>R</sup>D<sup>P</sup>R<sup>S</sup>T<sup>E</sup>T<sup>L</sup>Q<sup>S</sup>F<sup>M</sup>K<sup>A</sup>I<sup>D</sup>W<sup>A</sup>K<sup>.A</sup>G<sup>R</sup>F<sup>T</sup>Q<sup>Q</sup>.D<sup>I</sup>D<sup>E</sup>A<sup>K</sup>L<sup>S</sup>V<sup>F</sup>S<sup>V</sup>V<sup>D</sup>A<sup>P</sup>V<sup>A</sup>P<sup>S</sup>D<sup>K</sup>...G<sup>L</sup>D<sup>H</sup>F<sup>L</sup>Y<sup>G</sup>L<sup>S</sup>D<sup>E</sup>M<sup>K</sup>Q  
Fln\_Pf A<sup>R</sup>D<sup>P</sup>N<sup>L</sup>E<sup>K</sup>T<sup>A</sup>T<sup>F</sup>R<sup>E</sup>S<sup>A</sup>K<sup>G</sup>L<sup>R</sup>K<sup>M</sup>A<sup>D</sup>T<sup>M</sup>T<sup>E</sup>N<sup>D</sup>L<sup>R</sup>Y<sup>I</sup>I<sup>N</sup>T<sup>I</sup>G<sup>T</sup>I<sup>D</sup>K<sup>P</sup>R<sup>R</sup>G<sup>I</sup>E<sup>L</sup>S<sup>K</sup>L<sup>S</sup>F<sup>L</sup>R<sup>L</sup>I<sup>S</sup>N<sup>E</sup>S<sup>E</sup>Q<sup>D</sup>R<sup>V</sup>

1030 1040 1050 1060 1070 1080  
AtPreP1 R<sup>K</sup>R<sup>E</sup>E<sup>I</sup>L<sup>T</sup>S<sup>L</sup>K<sup>D</sup>F<sup>K</sup>D<sup>F</sup>A<sup>Q</sup>A<sup>I</sup>D<sup>V</sup>V<sup>R</sup>D<sup>K</sup>G<sup>V</sup>A<sup>V</sup>A<sup>V</sup>A<sup>S</sup>A<sup>E</sup>D<sup>I</sup>D<sup>A</sup>A<sup>N</sup>N<sup>E</sup>R<sup>S</sup>N<sup>F</sup>F<sup>E</sup>V<sup>K</sup>K<sup>A</sup>L..  
AtPreP2 I<sup>R</sup>R<sup>E</sup>E<sup>I</sup>L<sup>S</sup>T<sup>S</sup>L<sup>K</sup>D<sup>F</sup>K<sup>E</sup>F<sup>A</sup>E<sup>A</sup>I<sup>D</sup>S<sup>V</sup>S<sup>D</sup>K<sup>G</sup>V<sup>A</sup>V<sup>A</sup>V<sup>A</sup>S<sup>Q</sup>E<sup>D</sup>I<sup>D</sup>A<sup>A</sup>N<sup>R</sup>R<sup>S</sup>N<sup>F</sup>F<sup>E</sup>V<sup>K</sup>K<sup>A</sup>L..  
PreP\_Sp N<sup>R</sup>R<sup>K</sup>Q<sup>L</sup>L<sup>N</sup>V<sup>S</sup>A<sup>N</sup>D<sup>L</sup>K<sup>A</sup>V<sup>A</sup>K<sup>K</sup>Y<sup>L</sup>V<sup>N</sup>P<sup>K</sup>K<sup>S</sup>Y<sup>T</sup>.A<sup>V</sup>L<sup>G</sup>P<sup>K</sup>S<sup>E</sup>.K<sup>Q</sup>L<sup>P</sup>T<sup>W</sup>V<sup>I</sup>D<sup>K</sup>F<sup>E</sup>S...  
Mop112\_Sc A<sup>R</sup>R<sup>E</sup>Q<sup>L</sup>L<sup>D</sup>V<sup>S</sup>L<sup>L</sup>D<sup>V</sup>H<sup>R</sup>V<sup>A</sup>E<sup>K</sup>Y<sup>L</sup>L<sup>N</sup>.K<sup>E</sup>G<sup>V</sup>S<sup>.T</sup>V<sup>I</sup>G<sup>P</sup>I<sup>E</sup>G<sup>K</sup>T<sup>V</sup>S<sup>P</sup>N<sup>W</sup>E<sup>V</sup>K<sup>E</sup>L...  
PreP\_Mm A<sup>Y</sup>R<sup>E</sup>Q<sup>L</sup>F<sup>A</sup>V<sup>N</sup>H<sup>D</sup>K<sup>L</sup>T<sup>S</sup>V<sup>S</sup>H<sup>K</sup>Y<sup>L</sup>G<sup>I</sup>G<sup>S</sup>T<sup>H</sup>G<sup>L</sup>A<sup>I</sup>L<sup>G</sup>P<sup>E</sup>N<sup>S</sup>K<sup>I</sup>A<sup>K</sup>D<sup>P</sup>S<sup>W</sup>I<sup>K</sup>...  
PreP\_Rn T<sup>Y</sup>R<sup>E</sup>Q<sup>L</sup>F<sup>A</sup>V<sup>T</sup>H<sup>D</sup>K<sup>L</sup>T<sup>S</sup>V<sup>S</sup>H<sup>K</sup>Y<sup>L</sup>G<sup>I</sup>G<sup>S</sup>T<sup>H</sup>G<sup>L</sup>A<sup>I</sup>L<sup>G</sup>P<sup>E</sup>N<sup>S</sup>K<sup>L</sup>A<sup>K</sup>D<sup>P</sup>S<sup>W</sup>I<sup>R</sup>...  
hPreP A<sup>H</sup>R<sup>E</sup>Q<sup>L</sup>F<sup>A</sup>V<sup>S</sup>H<sup>D</sup>K<sup>L</sup>L<sup>A</sup>V<sup>S</sup>D<sup>R</sup>Y<sup>L</sup>G<sup>T</sup>G<sup>S</sup>T<sup>H</sup>G<sup>L</sup>A<sup>I</sup>L<sup>G</sup>P<sup>E</sup>N<sup>P</sup>K<sup>I</sup>A<sup>K</sup>D<sup>P</sup>S<sup>W</sup>I<sup>R</sup>...  
PreP\_Cf V<sup>H</sup>R<sup>E</sup>Q<sup>L</sup>F<sup>A</sup>V<sup>S</sup>R<sup>E</sup>G<sup>L</sup>I<sup>N</sup>V<sup>S</sup>T<sup>K</sup>Y<sup>L</sup>G<sup>I</sup>G<sup>S</sup>T<sup>H</sup>G<sup>L</sup>A<sup>L</sup>L<sup>G</sup>P<sup>E</sup>N<sup>A</sup>E<sup>I</sup>A<sup>K</sup>D<sup>P</sup>S<sup>W</sup>I<sup>R</sup>...  
PreP\_Bt V<sup>H</sup>R<sup>E</sup>Q<sup>L</sup>F<sup>T</sup>V<sup>C</sup>H<sup>E</sup>D<sup>L</sup>V<sup>D</sup>V<sup>S</sup>N<sup>R</sup>Y<sup>L</sup>G<sup>A</sup>R<sup>S</sup>T<sup>H</sup>G<sup>V</sup>A<sup>L</sup>L<sup>G</sup>P<sup>D</sup>N<sup>A</sup>S<sup>I</sup>A<sup>K</sup>D<sup>P</sup>S<sup>W</sup>I<sup>R</sup>Q<sup>R</sup>...  
Fln\_Pf E<sup>F</sup>R<sup>K</sup>R<sup>I</sup>M<sup>N</sup>T<sup>K</sup>K<sup>E</sup>D<sup>F</sup>Y<sup>K</sup>F<sup>A</sup>D<sup>L</sup>L<sup>E</sup>S<sup>K</sup>V<sup>N</sup>E<sup>F</sup>E<sup>K</sup>N<sup>L</sup>V<sup>I</sup>I<sup>T</sup>T<sup>T</sup>K<sup>E</sup>K<sup>A</sup>N<sup>E</sup>Y<sup>I</sup>A<sup>N</sup>V<sup>D</sup>G<sup>E</sup>F<sup>K</sup>V<sup>L</sup>I<sup>E</sup>
